# Supplementary material for: Random mixed-metal Co1−xNix single-chain magnets with simultaneous azide, carboxylate and tetrazolate bridges
Source: Royal Society of Chemistry journal article supplement (doi:10.1039/c8dt01676c), 2018-01-01
Supplement: c8dt01676c1.pdf [file c8dt01676c1.pdf]

## Electronic Supplementary Information (ESI)

### **Random mixed-metal $\text{Co}_{1-x}\text{Ni}_x$ single-chain magnets with simultaneous azide, carboxylate and tetrazolate bridges**

Xiu-Bing Li,<sup>a,b</sup> Ai-Ling Cheng,<sup>a</sup> and En-Qing Gao<sup>\*a</sup>

\*

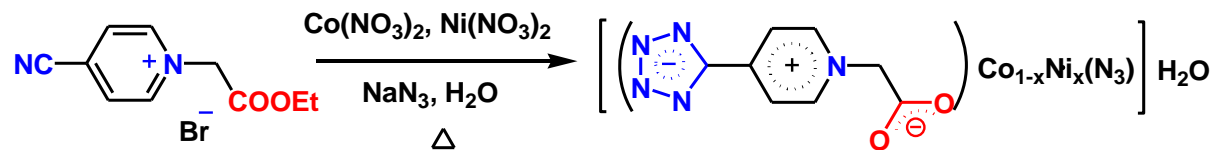

**Scheme S1.** Synthesis of the compounds involving *in-situ* ligand formation.

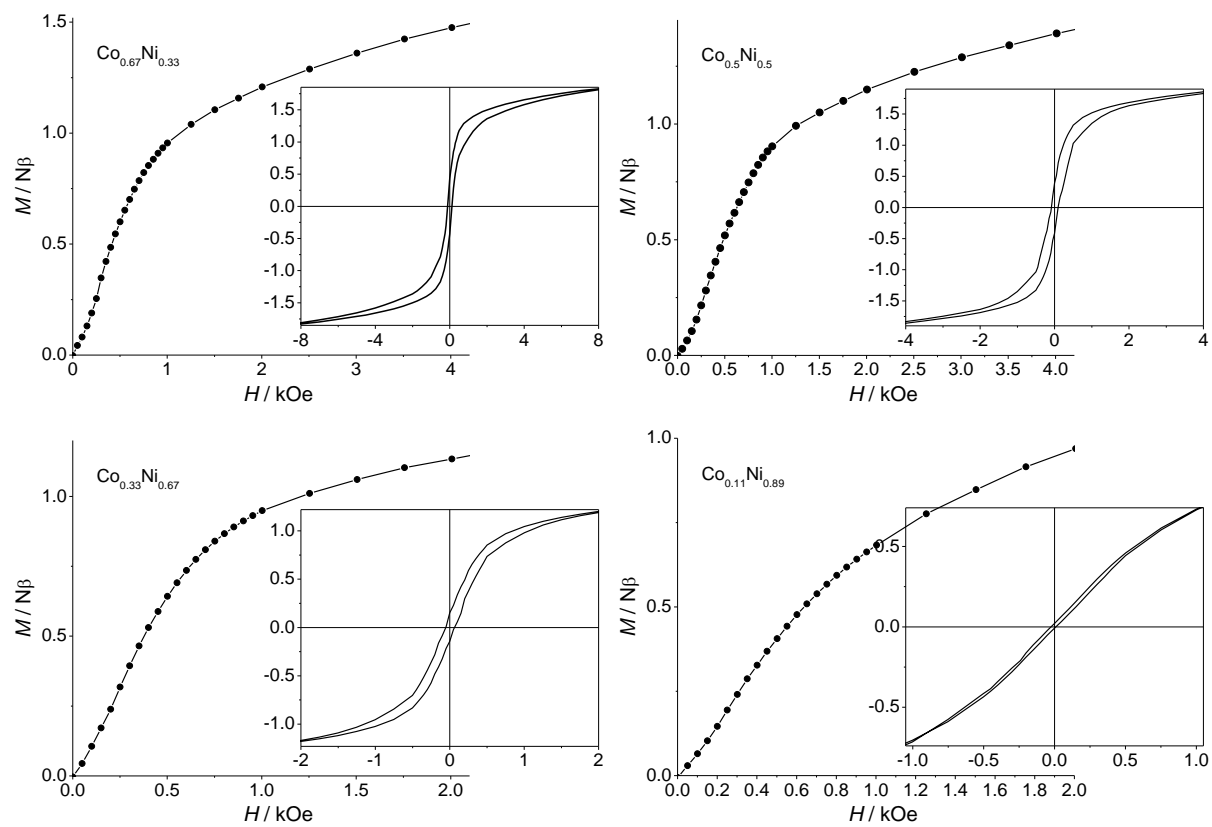

**Figure S1.**  $\ln(\chi T)-1/T$  plots with the linear-fit lines for the  $\text{Fe}_{1-x}\text{Co}_x$  series.

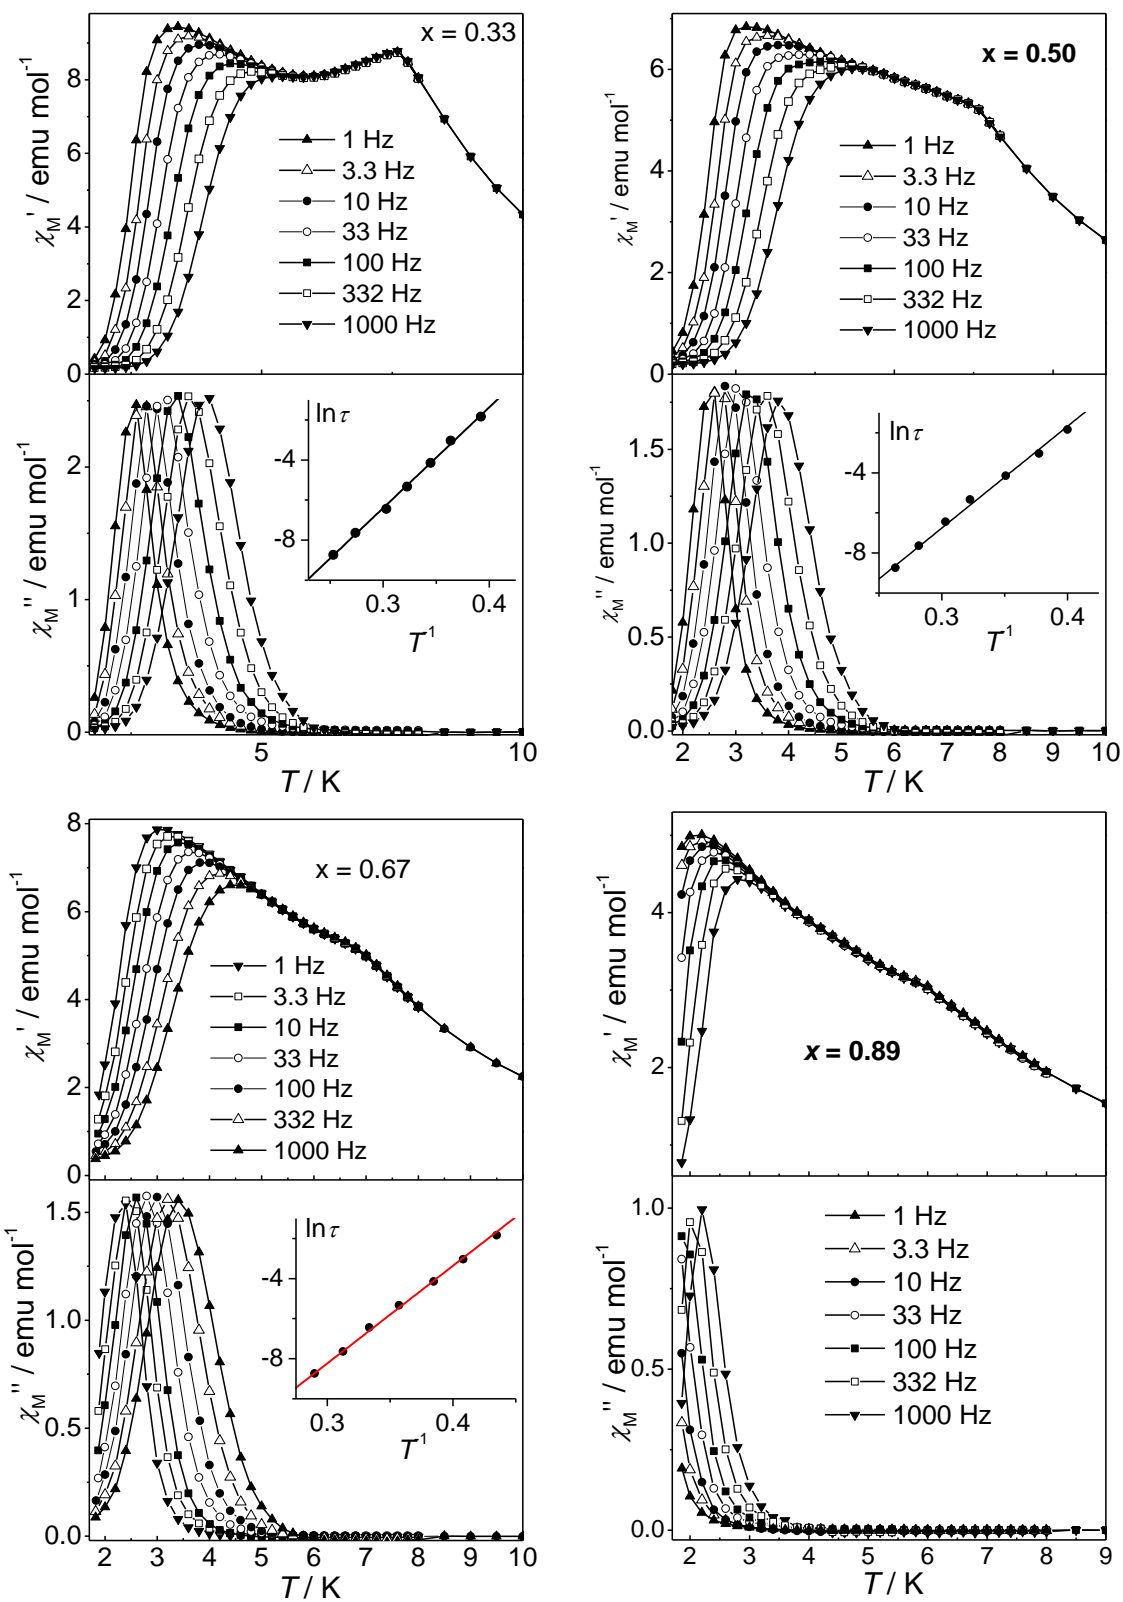

**Figure S2.** AC susceptibilities for  $x = 0.33$ ,  $0.50$ ,  $0.67$  and  $0.89$ . The insets is the fit to the Arrhenius law.

**Table S1.** Metal composition of the mixed-metal materials

| Starting molar ratio<br>(Co/Ni) | x(Ni)<br>(starting) | x(Ni)<br>(measured) |
|---------------------------------|---------------------|---------------------|
| 8/1                             | 0.11                | 0.14                |
| 2/1                             | 0.33                | 0.30                |
| 1/1                             | 0.50                | 0.46                |
| 1/2                             | 0.67                | 0.62                |
| 1/8                             | 0.89                | 0.90                |
